# Supplementary material for: An insight into the optical properties of a sub nanosize glutathione stabilized gold cluster
Source: Royal Society of Chemistry journal article supplement (doi:10.1039/c6dt01753c), 2016-01-01
Supplement: c6dt01753c1.pdf [file c6dt01753c1.pdf]

## Supporting Information

# An insight into the optical property of sub nano size glutathione stabilized gold cluster

Lakshmi V Nair, Resmi V Nair, Ramapurath S Jayasree\*

Division of Biophotonics and Imaging, SreeChitraTirunal Institute for Medical Sciences and Technology, Biomedical Technology Wing, Trivandrum 695012, India.

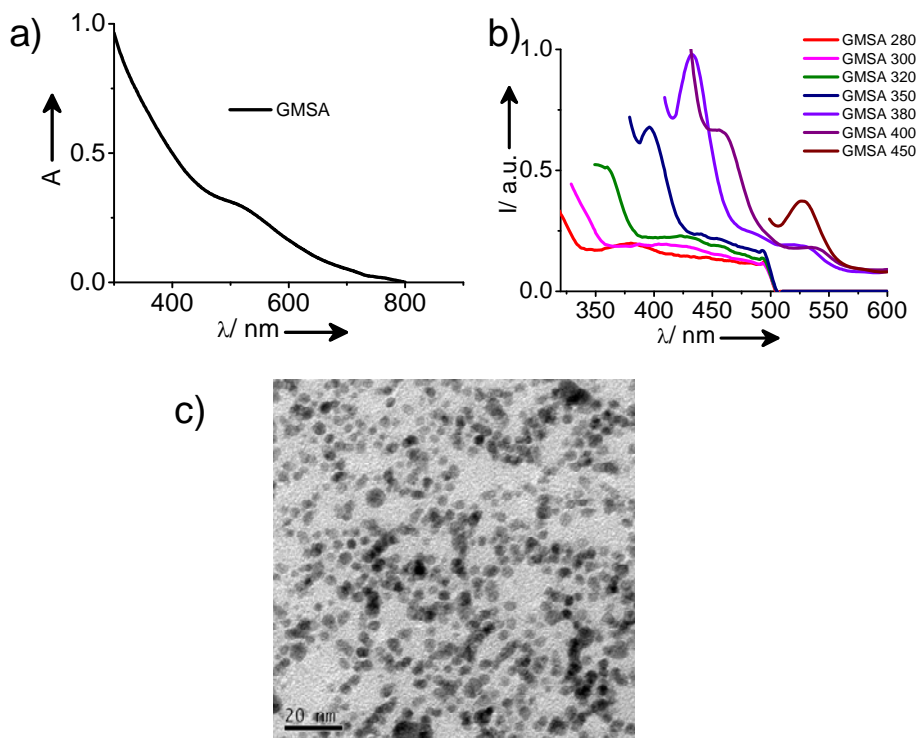

**Fig. S1** (a) Absorbance, (b) fluorescence at different excitation and (c) TEM of GMSA

| Name of the cluster | pH  | Temperature |                 | Emission @ 450 nm excitation (nm) | $(\lambda_{\max})$ 750/ $(\lambda_{\max})$ 530 @ 450 nm excitation |
|---------------------|-----|-------------|-----------------|-----------------------------------|--------------------------------------------------------------------|
|                     |     | GSH         | Reaction @ 12 h |                                   |                                                                    |
| AuC1                | 1.5 | 27°         | 27°             | 750                               | 1.2                                                                |
| AuC2                | 1.5 | 27°         | 70°             | 750                               | 2.5                                                                |
| AuC3                | 1.5 | 0°          | 70°             | 750                               | 50.42                                                              |
| AuC4                | 10  | 27°         | 70°             |                                   |                                                                    |

Table S1: Comparison of reaction condition on fluorescence property

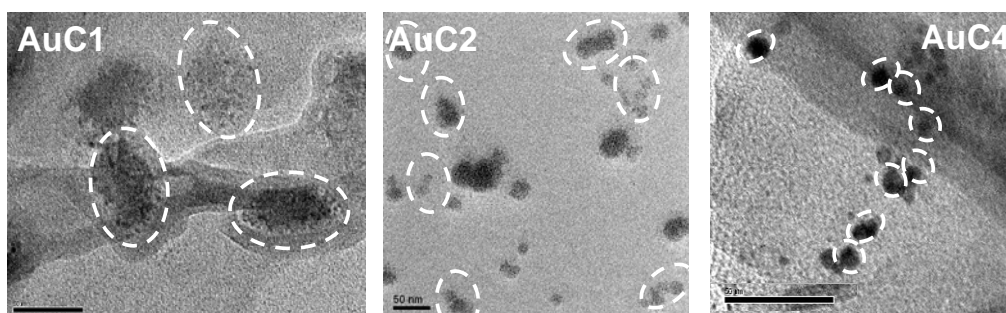

**Fig.S2** Lower magnification TEM image of AuC1, AuC2 and AuC4. All the scale bars are 50 nm

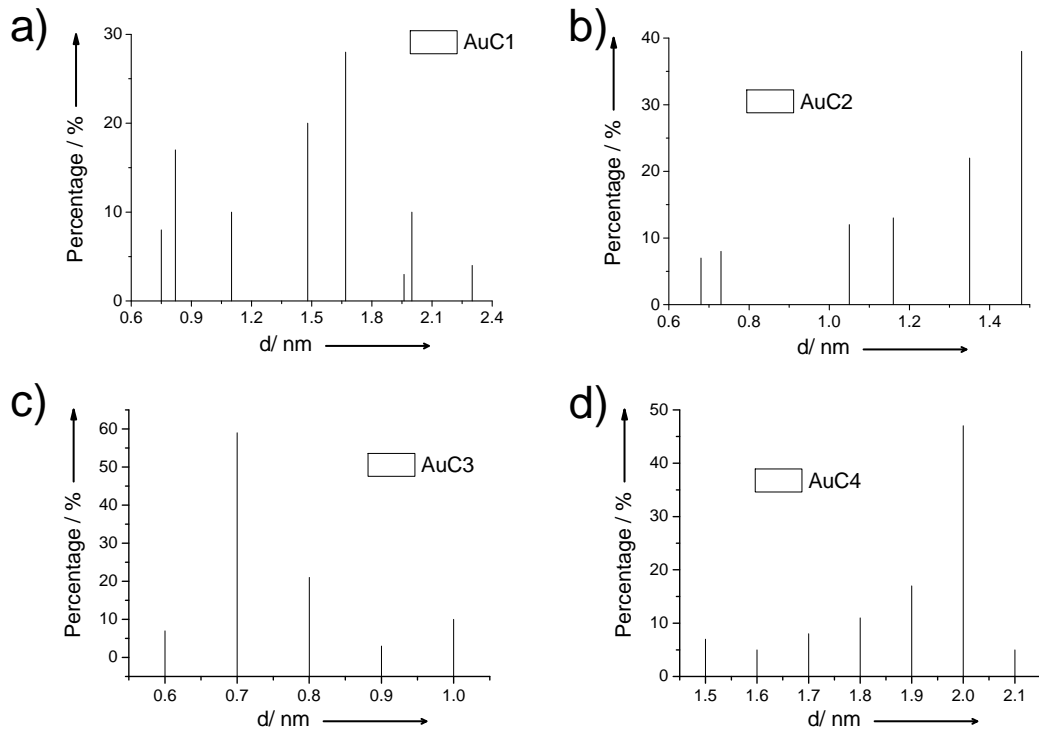

**Fig. S3** Size distribution of the cluster from TEM.

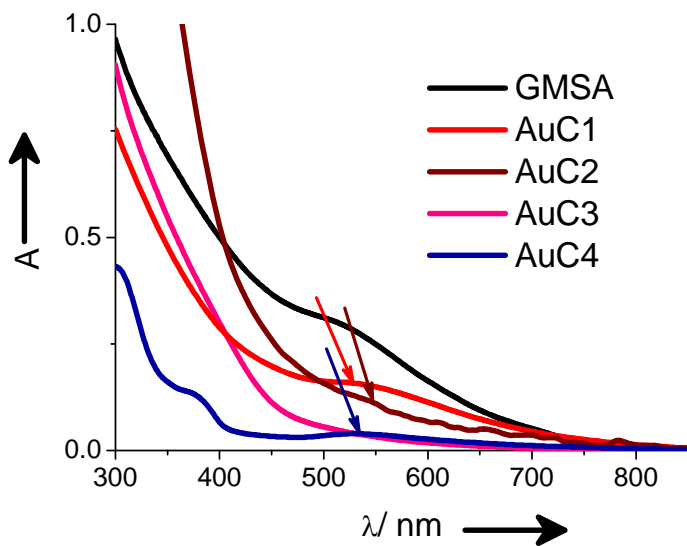

**Fig.S4** UV- Visible absorbance spectra of developed nano materials

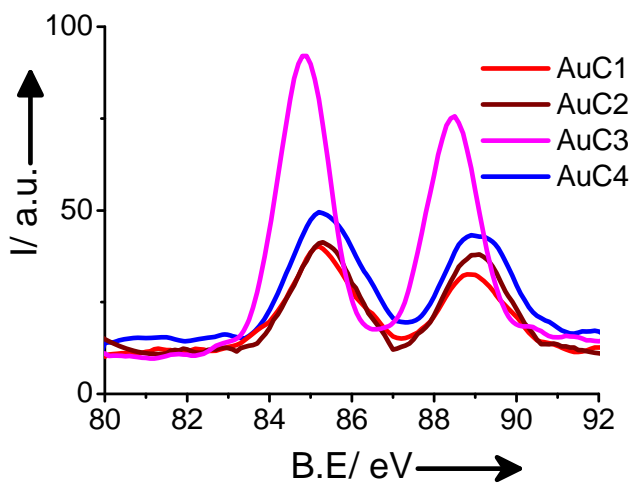

Fig. S5XPS spectra of the developed clusters

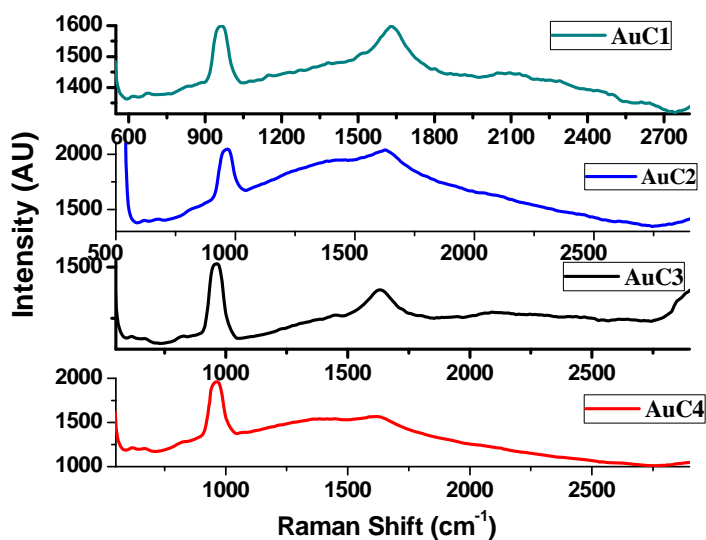

Fig. S6 Raman Spectra of AuC1, AuC2, AuC3 and AuC4 , Individual and magnified spectra of AuC1,AuC2,AuC3 and AuC4 in the range 1000 to 1700  $\text{cm}^{-1}$  are shown in Fig S6a-d

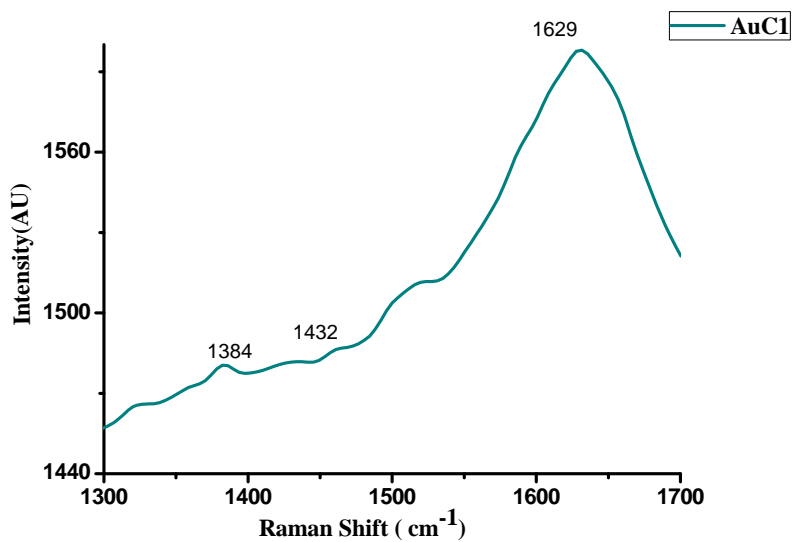

S6a

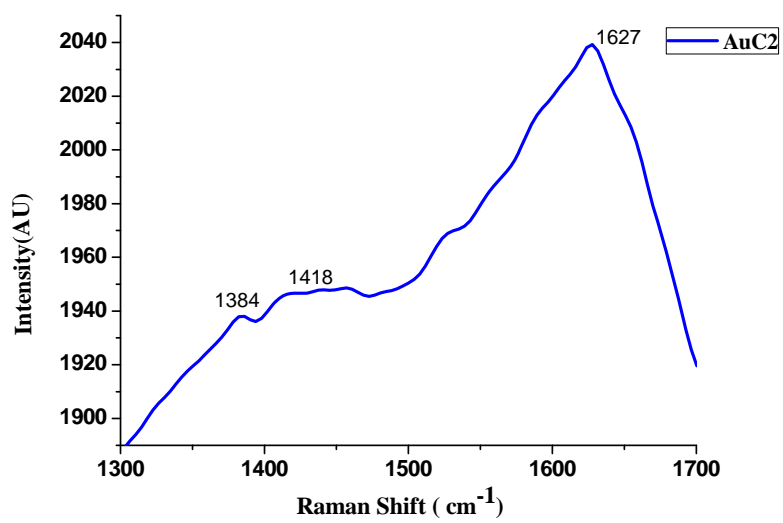

S6b

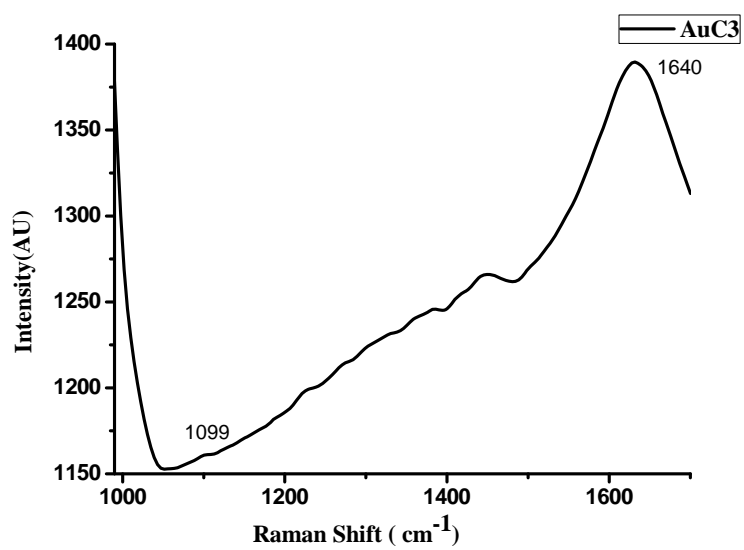

S6c

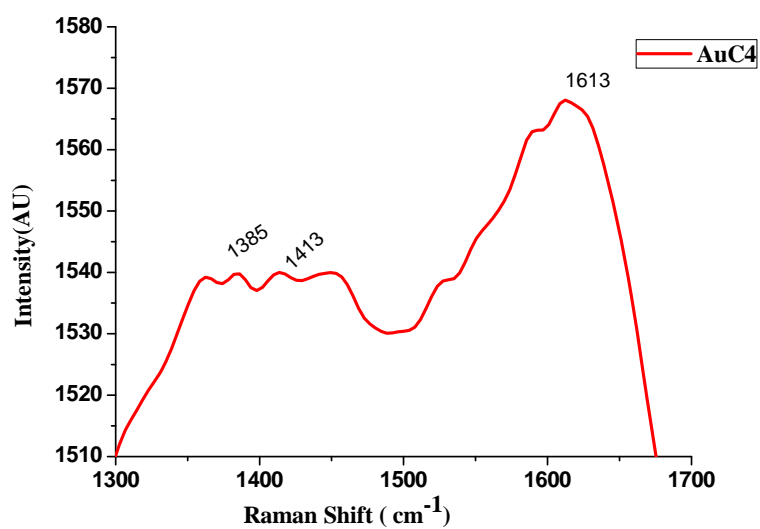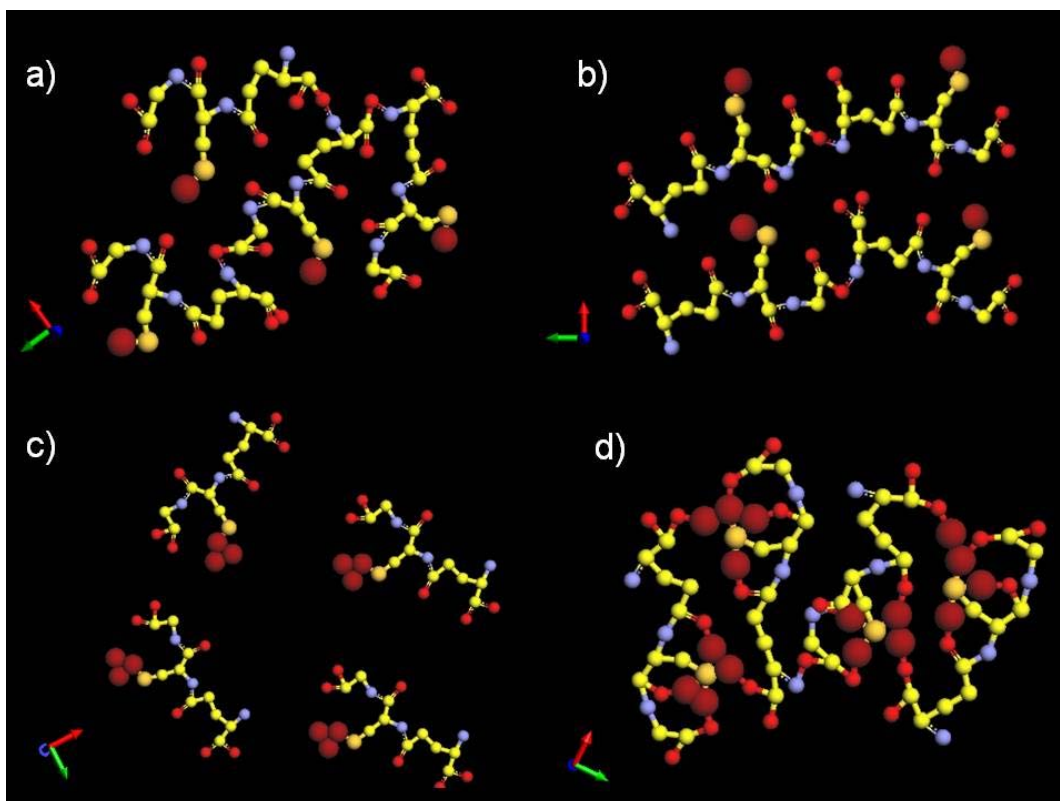

**Fig. S7** Optimized geometry of self assembled structures, AuC1 (a), AuC2 (b), AuC3 (c) and AuC4 (d). In all the cases 4 repeated units are shown. Au, S, C, O and N are represented in brown, orange, yellow, red and blue respectively.

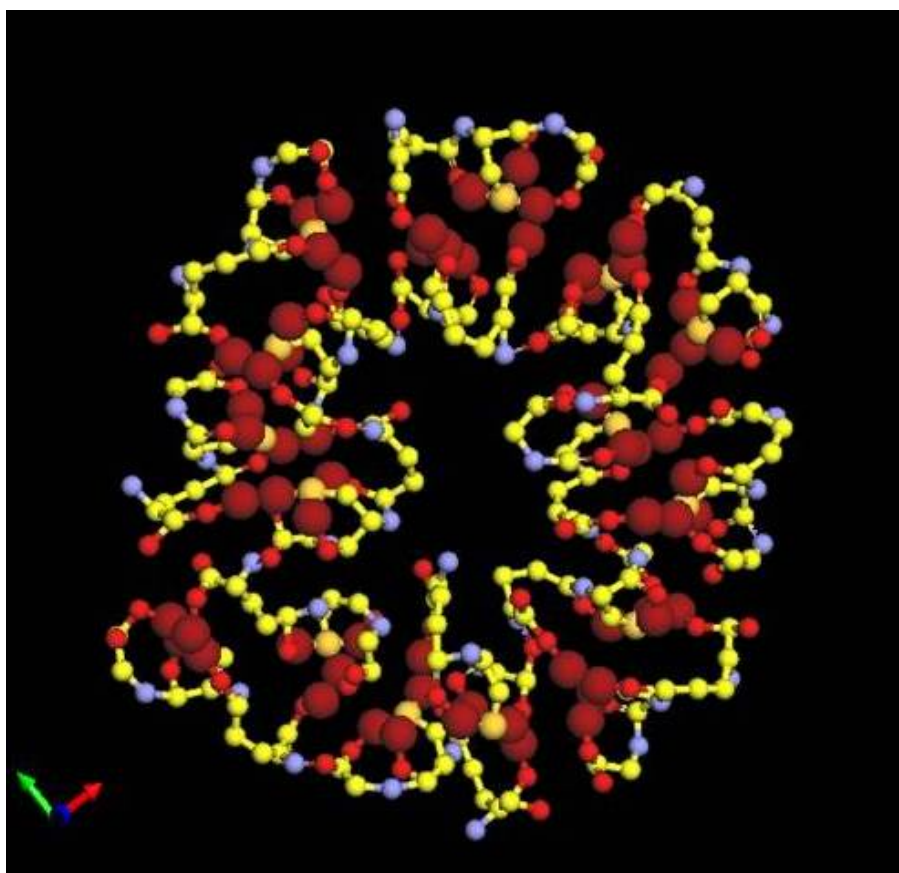

**Fig. S8** Optimized geometry of self assembled structures AuC4 showing the pattern similar to the one observed in the TEM image. Note the central gap.

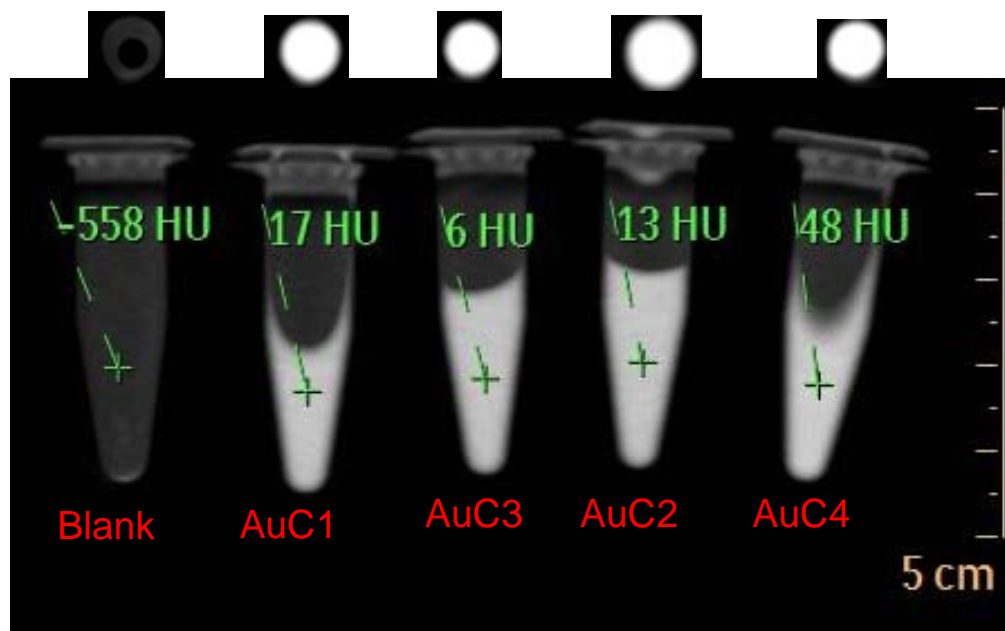

**Fig.S9** CT image of the developed cluster

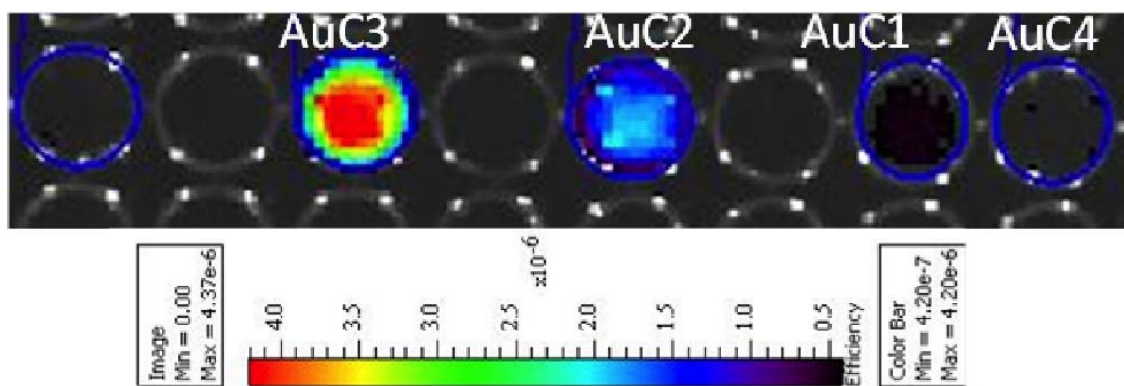

Fig. S10: Optical imaging of the developed clusters shown along with the color coded efficiency bar.

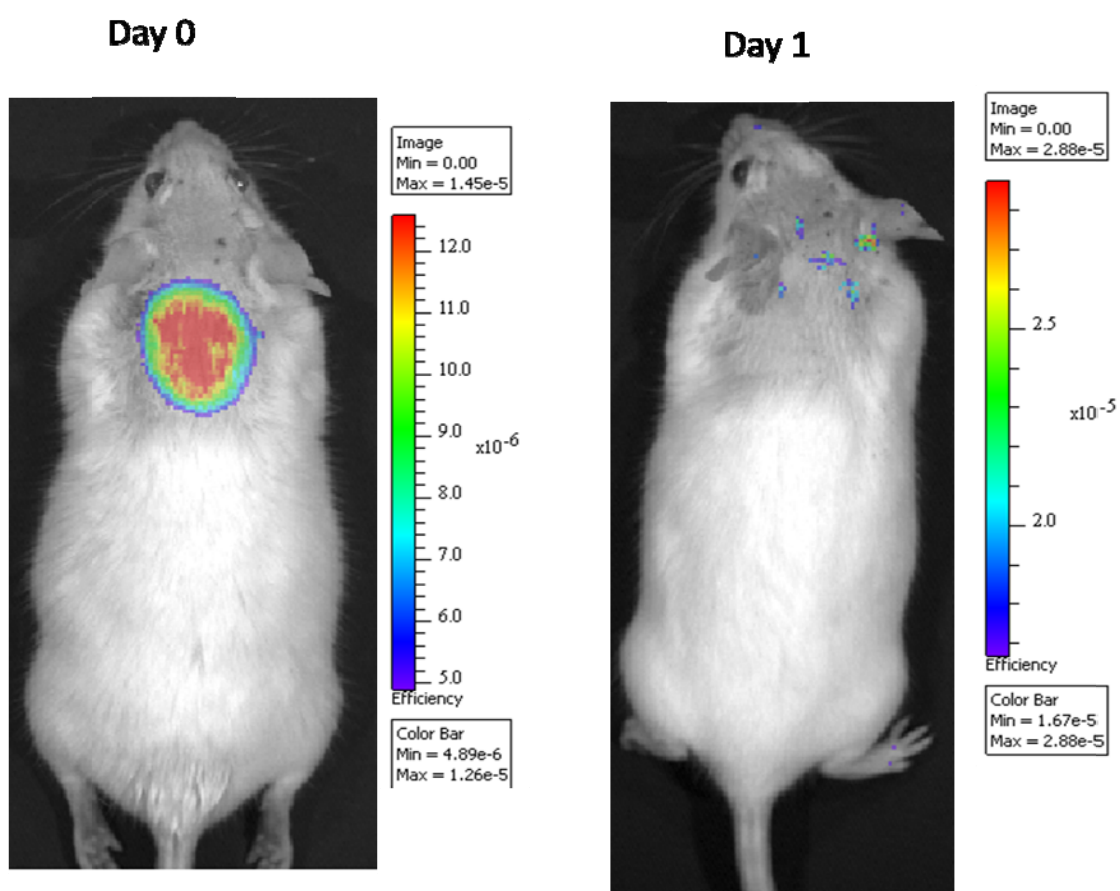

Fig. S11: *In vivo* optical imaging potential of AuC3 in mouse and its clearance from the body on the next day shown along with the color coded efficiency bar.
